# Supplementary material for: A machine learning model for predicting deterioration of COVID-19 inpatients
Source: PubMed Central journal article supplement (PMC8850417; doi:10.1038/s41598-022-05822-7), 2022-02-16
Supplement: 41598_2022_5822_MOESM1_ESM.pdf [file 41598_2022_5822_MOESM1_ESM.pdf]

Supplementary information

## **A Machine Learning Model for Predicting Deterioration of COVID-19 inpatients**

Omer Noy<sup>\*,1</sup>, Dan Coster<sup>\*,1,2</sup>, Maya Metzger<sup>1</sup>, Itai Atar<sup>2</sup>, Shani Shenhar-Tsarfaty<sup>2,3</sup>,  
Shlomo Berliner<sup>2,3</sup>, Galia Rahav<sup>2,4</sup>, Ori Rogowski<sup>2,3</sup>, Ron Shamir<sup>1</sup>

<sup>1</sup> Blavatnik School of Computer Science, Tel-Aviv University, Tel-Aviv, Israel

<sup>2</sup> Sackler Faculty of Medicine, Tel-Aviv University, Tel-Aviv, Israel

<sup>3</sup> Department of Internal Medicine “C”, Tel-Aviv Sourasky Medical Center

<sup>4</sup> Infectious Diseases Unit, Sheba Medical Center, Ramat Gan, Israel

\* Equal contribution.

**Corresponding Author:** Ron Shamir

**Email:** [rshamir@tau.ac.il](mailto:rshamir@tau.ac.il)

**Phone Number:** +972-54-304-3337

**Postal address:** School of Computer Science, Tel-Aviv University, 30 Haim Levanon  
Street, Tel-Aviv, Israel, 69978

**Keywords:** COVID-19, risk prediction, early detection of deterioration, machine  
learning, electronic medical records

## SUPPLEMENTARY FIGURES AND TABLES

**Supplementary Figure 1:** Patient timeline from symptoms to deterioration. Data from the entire hospitalization period was utilized for model prediction, starting from the hospital admission. The green interval is when the deterioration predictions are made. Red areas represent blocked prediction periods during which no predictions are made: the six hours period prior to the deterioration event, and the eight hours period afterward. The length of the prediction window and the blocked prediction periods were predefined with clinical experts and can be easily tailored to fit other clinical settings.

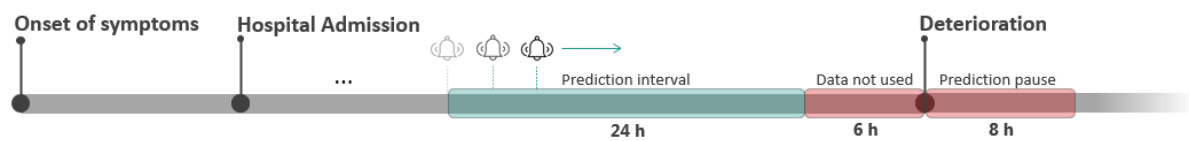

**Supplementary Figure 2:** Death and ICU admission rates as a function of the maximal mNEWS2 score during hospitalization in the development dataset.

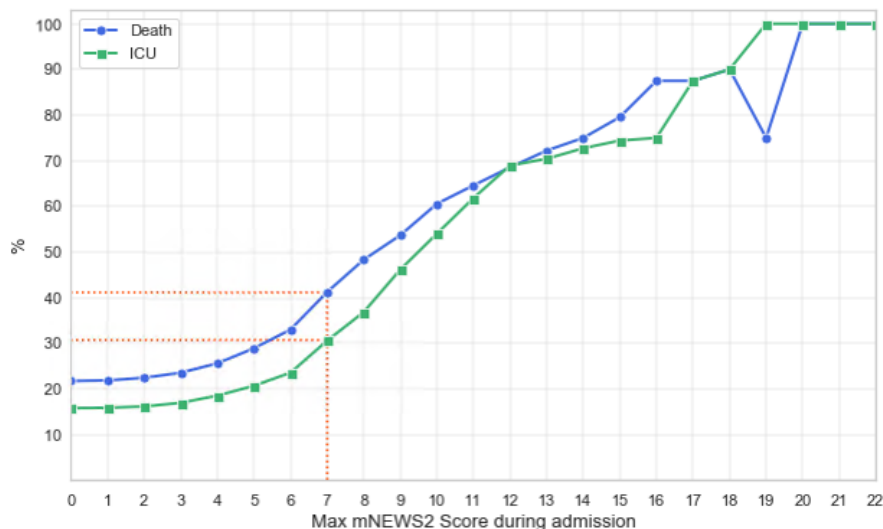

**Supplementary Figure 3:** Outline of the data partition and model development. First, the development dataset (Sheba) was split into 80% training and 20% testing subsets (1). To estimate the performance of 14 machine learning models, 20-fold cross-validation over the training set was performed (2). Then, the final model was trained over the entire training set (3) and evaluated on the testing set (4). External validation was done on the validation set (TASMC) (5).

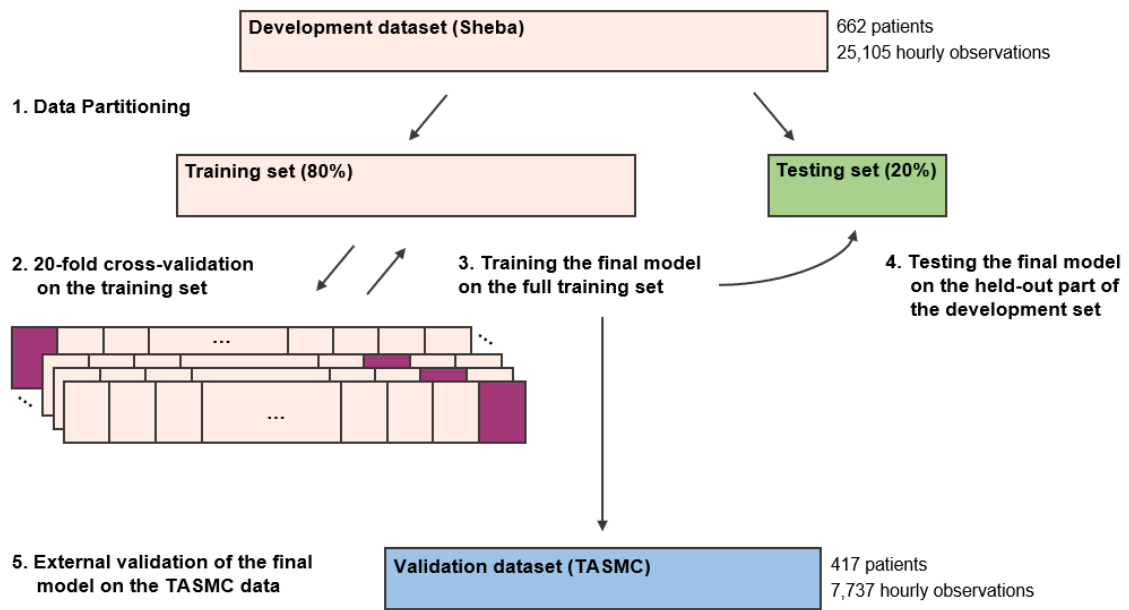

**Supplementary Figure 4:** Feature importance calculated by CatBoost (“PredictionValuesChange” metric). Features (rows) are ordered in decreasing overall importance. The importance score of a feature (x axis) is determined by how much on average the prediction changes when the feature value changes. A bigger change in the prediction value implies a higher importance.

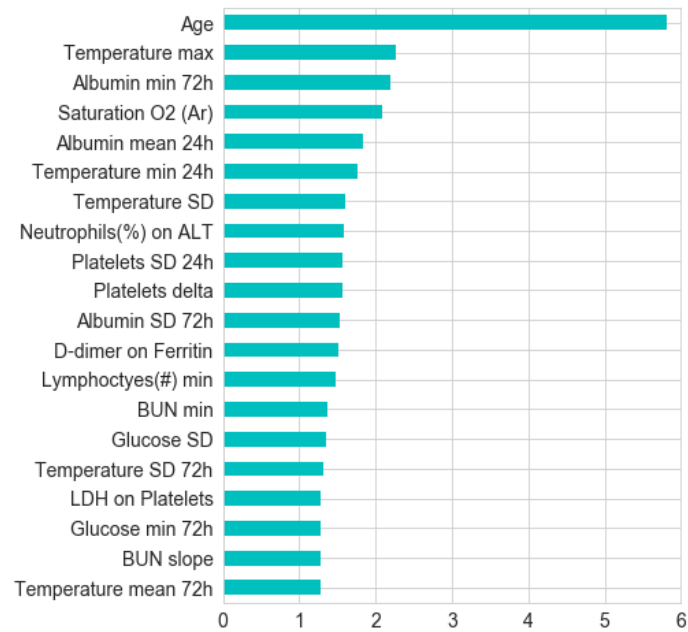

**Supplementary Table 1: The mNEWS2 score.** Scores are computed by summing the points for each category. This is an adapted version of the NEWS2 score, with the addition of 3 points for patients with age $\geq$ 65 [10].

| Points              | 3           | 2      | 1         | 0         | 1         | 2       | 3                                           |
|---------------------|-------------|--------|-----------|-----------|-----------|---------|---------------------------------------------|
| Age                 |             |        |           | <65       |           |         | $\geq$ 65                                   |
| Respiratory Rate    | $\leq$ 8    |        | 9-11      | 12-20     |           | 21-24   | $\geq$ 25                                   |
| Oxygen Saturation   | $\leq$ 91   | 92-93  | 94-95     | $\geq$ 96 |           |         |                                             |
| Supplemental Oxygen |             | Yes    |           | No        |           |         |                                             |
| Systolic BP         | $\leq$ 90   | 91-100 | 101-110   | 111-219   |           |         | $\geq$ 220                                  |
| Heart Rate          | $\leq$ 40   |        | 41-50     | 51-90     | 91-110    | 111-130 | $\geq$ 131                                  |
| Consciousness       |             |        |           | Alert     |           |         | Drowsiness<br>Lethargy<br>Coma<br>Confusion |
| Temperature         | $\leq$ 35.0 |        | 35.1-36.0 | 36.1-38.0 | 38.1-39.0 |         | $\geq$ 39.1                                 |

| Score                     | Risk Grading |
|---------------------------|--------------|
| 0                         | -            |
| 1-4                       | Low          |
| 5-6 or 3 in one parameter | Medium       |
| $\geq$ 7                  | High         |

**Supplementary Table 2: Table of Characteristics.** Population characteristics for the two datasets used to develop and validate the model. Characteristics of both static features and first measurements of dynamic features are presented. P-values were calculated using Fisher's exact test and T-test for categorical and numerical values, respectively, and Bonferroni corrected for multiple comparisons. 'AR' and 'V' refer to arterial and venous blood, respectively.

| Variable         | Development (Sheba Hospital) |                     | Validation (TASMC) |                     | P-Value |
|------------------|------------------------------|---------------------|--------------------|---------------------|---------|
|                  | N (%)                        | Mean $\pm$ SD       | N (%)              | Mean $\pm$ SD       |         |
| Overall          | <b>662</b>                   |                     | <b>417</b>         |                     |         |
| Age              | 662 (100.0%)                 | 65.91 $\pm$ 16.86   | 417 (100.0%)       | 67.16 $\pm$ 18.01   | 1       |
| Gender           |                              |                     | 1                  |                     |         |
| <b>Male</b>      | 391 (59.06%)                 |                     | 241 (57.79%)       |                     |         |
| <b>Female</b>    | 271 (40.94%)                 |                     | 176 (42.21%)       |                     |         |
| Mortality        | 144 (21.75%)                 |                     | 73 (17.51%)        |                     | 1       |
| BMI              | 497 (75.08%)                 | 28.21 $\pm$ 7.51    | 234 (56.12%)       | 27.37 $\pm$ 5.88    | 1       |
| Weight           | 507 (76.59%)                 | 81.11 $\pm$ 19.76   | 245 (58.75%)       | 77.25 $\pm$ 18.48   | 0.5385  |
| Hypertension     |                              |                     | <0.0001            |                     |         |
| <b>Yes</b>       | 287 (43.35%)                 |                     | 60 (14.39%)        |                     |         |
| <b>No</b>        | 375 (56.65%)                 |                     | 357 (85.61%)       |                     |         |
| Diabetes         |                              |                     | 0.0046             |                     |         |
| <b>Yes</b>       | 195 (29.46%)                 |                     | 83 (19.9%)         |                     |         |
| <b>No</b>        | 467 (70.54%)                 |                     | 334 (80.1%)        |                     |         |
| Cancer           |                              |                     | 0.0008             |                     |         |
| <b>Yes</b>       | 91 (13.75%)                  |                     | 26 (6.24%)         |                     |         |
| <b>No</b>        | 571 (86.25%)                 |                     | 391 (93.76%)       |                     |         |
| Hepatitis B      |                              |                     | 1                  |                     |         |
| <b>Yes</b>       | 5 (0.76%)                    |                     | 3 (0.72%)          |                     |         |
| <b>No</b>        | 657 (99.24%)                 |                     | 414 (99.28%)       |                     |         |
| CKD              |                              |                     | 1                  |                     |         |
| <b>Yes</b>       | 43 (6.5%)                    |                     | 27 (6.47%)         |                     |         |
| <b>No</b>        | 619 (93.5%)                  |                     | 390 (93.53%)       |                     |         |
| HIV              |                              |                     | 1                  |                     |         |
| <b>Yes</b>       | 1 (0.15%)                    |                     | 1 (0.24%)          |                     |         |
| <b>No</b>        | 661 (99.85%)                 |                     | 416 (99.76%)       |                     |         |
| CVD              |                              |                     | 0.0046             |                     |         |
| <b>Yes</b>       | 149 (22.51%)                 |                     | 58 (13.91%)        |                     |         |
| <b>No</b>        | 513 (77.49%)                 |                     | 359 (86.09%)       |                     |         |
| COPD             |                              |                     | 1                  |                     |         |
| <b>Yes</b>       | 26 (3.93%)                   |                     | 22 (5.28%)         |                     |         |
| <b>No</b>        | 636 (96.07%)                 |                     | 395 (94.72%)       |                     |         |
| HBA1C (#)        | 108 (16.31%)                 | 45.34 $\pm$ 15.92   | 39 (9.35%)         | 54.11 $\pm$ 20.1    | 0.3497  |
| HBA1C (%)        | 108 (16.31%)                 | 6.3 $\pm$ 1.46      | 39 (9.35%)         | 7.1 $\pm$ 1.84      | 0.3629  |
| Albumin          | 658 (99.4%)                  | 35.81 $\pm$ 5.44    | 377 (90.41%)       | 38.35 $\pm$ 4.85    | <0.0001 |
| ALT              | 660 (99.7%)                  | 33.02 $\pm$ 29.06   | 412 (98.8%)        | 37.47 $\pm$ 72.29   | 1       |
| AST              | 661 (99.85%)                 | 46.63 $\pm$ 43.84   | 378 (90.65%)       | 43.44 $\pm$ 35.46   | 1       |
| BUN              | 662 (100.0%)                 | 23.42 $\pm$ 16.66   | 417 (100.0%)       | 22.8 $\pm$ 19.15    | 1       |
| Calcium          | 662 (100.0%)                 | 8.82 $\pm$ 0.64     | 379 (90.89%)       | 8.67 $\pm$ 0.59     | 0.0098  |
| CPK              | 644 (97.28%)                 | 219.57 $\pm$ 595.46 | 380 (91.13%)       | 232.15 $\pm$ 451.02 | 1       |
| Creatinine       | 662 (100.0%)                 | 1.18 $\pm$ 0.98     | 417 (100.0%)       | 1.2 $\pm$ 1.36      | 1       |
| Direct bilirubin | 359 (54.23%)                 | 0.28 $\pm$ 0.54     | 385 (92.33%)       | 0.26 $\pm$ 0.34     | 1       |
| D-dimer          | 627 (94.71%)                 | 3.22 $\pm$ 4.81     | 371 (88.97%)       | 2.19 $\pm$ 3.88     | 0.0244  |

|                    |              |                 |              |                 |         |
|--------------------|--------------|-----------------|--------------|-----------------|---------|
| Ferritin           | 471 (71.15%) | 641.34 ± 1094.3 | 348 (83.45%) | 799.82 ± 1280.3 | 1       |
| Fibrinogen         | 577 (87.16%) | 500.56 ± 174.18 | 320 (76.74%) | 524.01 ± 145.45 | 1       |
| Glucose            | 662 (100.0%) | 135.34 ± 59.23  | 417 (100.0%) | 128.16 ± 66.65  | 1       |
| HCO3               | 597 (90.18%) | 24.62 ± 3.78    | 341 (81.77%) | 24.35 ± 4.33    | 1       |
| HGB                | 662 (100.0%) | 12.67 ± 2.14    | 417 (100.0%) | 13.2 ± 1.94     | 0.0022  |
| INR                | 656 (99.09%) | 1.13 ± 0.21     | 416 (99.76%) | 1.08 ± 0.21     | 0.0078  |
| Lactate            | 600 (90.63%) | 2.07 ± 1.07     | 178 (42.69%) | 2.07 ± 1.33     | 1       |
| LDH                | 656 (99.55%) | 353.77 ± 215.99 | 367 (88.01%) | 565.31 ± 269.78 | <0.0001 |
| Lymphocytes (#)    | 660 (99.7%)  | 1.18 ± 0.83     | 417 (100.0%) | 1.18 ± 0.95     | 1       |
| Lymphocytes (%)    | 662 (100.0%) | 18.3 ± 11.77    | 417 (100.0%) | 17.6 ± 12.02    | 1       |
| Neutrophils (#)    | 662 (100.0%) | 5.59 ± 3.86     | 417 (100.0%) | 6.09 ± 4.27     | 1       |
| Neutrophils (%)    | 662 (100.0%) | 71.7 ± 14.19    | 417 (100.0%) | 73.12 ± 13.49   | 1       |
| NRBC               | 98 (14.8%)   | 1.24 ± 0.97     | 416 (99.76%) | 0.2 ± 0.38      | <0.0001 |
| Osmolality (urine) | 25 (3.78%)   | 368.0 ± 158.68  | 47 (11.27%)  | 451.17 ± 186.09 | 1       |
| PO2 (AR)           | 56 (8.46%)   | 74.69 ± 27.7    | 341 (81.77%) | 40.04 ± 36.73   | <0.0001 |
| PO2 (V)            | 596 (90.03%) | 36.44 ± 27.54   | 81 (19.42%)  | 34.89 ± 35.42   | 1       |
| PCO2 (AR)          | 56 (8.46%)   | 49.83 ± 11.69   | 342 (82.01%) | 42.15 ± 9.08    | <0.0001 |
| PCO2 (V)           | 598 (90.33%) | 43.12 ± 8.95    | 76 (18.23%)  | 42.67 ± 11.0    | 1       |
| PH                 | 541 (81.72%) | 7.37 ± 0.08     | 341 (81.77%) | 7.38 ± 0.07     | 1       |
| Platelet           | 662 (100.0%) | 208.46 ± 99.93  | 417 (100.0%) | 202.05 ± 82.31  | 1       |
| Potassium          | 661 (99.85%) | 4.16 ± 0.61     | 417 (100.0%) | 4.04 ± 0.59     | 0.0758  |
| PTT                | 649 (98.04%) | 30.88 ± 9.79    | 416 (99.76%) | 32.32 ± 6.42    | 0.4093  |
| RBC                | 662 (100.0%) | 4.48 ± 0.75     | 417 (100.0%) | 4.48 ± 0.69     | 1       |
| RDW                | 662 (100.0%) | 14.83 ± 2.23    | 417 (100.0%) | 14.43 ± 1.68    | 0.0874  |
| Sodium             | 662 (100.0%) | 136.05 ± 5.69   | 417 (100.0%) | 136.0 ± 5.74    | 1       |
| Saturation O2 (AR) | 592 (89.43%) | 57.34 ± 24.21   | 247 (59.23%) | 64.32 ± 26.61   | 0.0119  |
| Total bilirubin    | 661 (99.85%) | 0.67 ± 0.68     | 412 (98.8%)  | 0.6 ± 0.48      | 1       |
| Triglycerides      | 367 (55.44%) | 162.83 ± 118.33 | 309 (74.1%)  | 135.95 ± 67.14  | 0.0217  |
| Troponin           | 575 (86.86%) | 98.5 ± 950.41   | 412 (98.8%)  | 51.92 ± 319.07  | 1       |
| VB12               | 312 (47.13%) | 610.9 ± 421.27  | 292 (70.02%) | 852.07 ± 511.04 | <0.0001 |
| WBC                | 662 (100.0%) | 7.55 ± 4.48     | 417 (100.0%) | 8.85 ± 14.28    | 1       |
| Temperature        | 662 (100.0%) | 37.016 ± 1.91   | 417 (100.0%) | 37.63 ± 0.92    | <0.0001 |
| Pulse              | 662 (100.0%) | 86.23 ± 16.66   | 417 (100.0%) | 87.59 ± 17.23   | 1       |
| Respiratory Rate   | 513 (77.49%) | 19.84 ± 9.0     | 113 (27.1%)  | 20.98 ± 9.74    | 1       |
| SBP                | 662 (100.0%) | 131.7 ± 24.65   | 417 (100.0%) | 136.94 ± 23.69  | 0.0295  |
| DBP                | 662 (100.0%) | 75.53 ± 13.23   | 417 (100.0%) | 75.96 ± 15.34   | 1       |
| Saturation         | 110 (16.62%) | 94.7 ± 5.92     | 415 (99.52%) | 92.75 ± 7.31    | 0.5151  |

**Supplementary Table 3: Performance metrics of the final model on the testing set for different thresholds.** PPV: positive predictive value, NPV: negative predictive value.

| <b>Threshold</b> | <b>Accuracy</b> | <b>Sensitivity</b> | <b>Specificity</b> | <b>PPV</b> | <b>NPV</b> |
|------------------|-----------------|--------------------|--------------------|------------|------------|
| <b>0.1</b>       | 0.66            | 0.88               | 0.56               | 0.48       | 0.91       |
| <b>0.2</b>       | 0.74            | 0.78               | 0.71               | 0.56       | 0.87       |
| <b>0.3</b>       | 0.77            | 0.69               | 0.80               | 0.62       | 0.84       |
| <b>0.4</b>       | 0.79            | 0.60               | 0.87               | 0.69       | 0.82       |
| <b>0.5</b>       | 0.79            | 0.55               | 0.91               | 0.73       | 0.81       |
| <b>0.6</b>       | 0.79            | 0.48               | 0.94               | 0.79       | 0.80       |
| <b>0.7</b>       | 0.80            | 0.44               | 0.97               | 0.87       | 0.79       |
| <b>0.8</b>       | 0.78            | 0.34               | 0.98               | 0.90       | 0.76       |
| <b>0.9</b>       | 0.73            | 0.17               | 0.99               | 0.93       | 0.72       |



**Supplementary Table 4: Minimum and maximum accepted values of the dynamic features.** Feature engineering was applied for the bolded features. 'AR' and 'V' refer to arterial and venous blood, respectively.

| <b>Feature</b>          | <b>Min</b> | <b>Max</b> | <b>Units</b>  | <b>Feature</b>         | <b>Min</b> | <b>Max</b> | <b>Units</b>  |
|-------------------------|------------|------------|---------------|------------------------|------------|------------|---------------|
| HBA1C (#)               | 0          | 240        | mmol/mol      | <b>Lymphocytes (%)</b> | 0.2        | 100        | %             |
| HBA1C (%)               | 0          | 24         | %             | <b>Neutrophils (#)</b> | 0.1        | 60         | 10e3/ $\mu$ L |
| <b>Albumin</b>          | 0          | 100        | g/L           | <b>Neutrophils (%)</b> | 0.2        | 100        | %             |
| <b>ALT</b>              | 0          | 20000      | U/L           | NRBC                   | 0          | 100        | %             |
| <b>AST</b>              | 0          | 20000      | U/L           | Osmolality (urine)     | 50         | 2000       | mosmo/kg      |
| Indirect bilirubin      | 0          | 20         | mg/dL         | <b>PO2 (AR)</b>        | 0          | 1000       | mmHg          |
| <b>Direct bilirubin</b> | 0          | 20         | mg/dL         | PO2 (V)                | 0          | 1000       | mmHg          |
| BNP                     | 0          | 10000      | PG/ML         | PCO2 (AR)              | 0          | 150        | mmHg          |
| Respiratory rate        | 1          | 100        | BPM           | PCO2 (V)               | 0          | 150        | mmHg          |
| <b>BUN</b>              | 2          | 200        | mg/dL         | PH                     | 6.6        | 7.8        |               |
| Calcium                 | 0          | 20         | mg/dL         | <b>Platelet</b>        | 0          | 1000       | 10e3/ $\mu$ L |
| CKMB                    | 0          | 10000      | U/L           | Potassium              | 1          | 10         | mmol/L        |
| CPK                     | 0          | 10000      | U/L           | <b>PTT</b>             | 5          | 200        | Sec           |
| CRP                     | 0          | 1000       | mg/L          | Pulse                  | 10         | 300        | BPM           |
| Creatinine              | 0          | 20         | mg/dL         | RBC                    | 1          | 8          | 10e6/ $\mu$ L |
| DBP                     | 20         | 240        | mmHG          | RDW                    | 5          | 40         | %             |
| <b>D-dimer</b>          | 0          | 50         | FEU mg/L      | SBP                    | 40         | 250        | mmHG          |
| <b>Ferritin</b>         | 0          | 20000      | ng/ml         | Sodium                 | 110        | 200        | mmol/L        |
| <b>Fibrinogen</b>       | 0          | 1500       | mg/dL         | Saturation O2 (AR)     | 5          | 100        | %             |
| <b>Glucose</b>          | 0          | 2000       | mg/dL         | <b>Saturation</b>      | 5          | 100        | %             |
| HCO3                    | 0          | 100        | mmol/L        | Total bilirubin        | 0          | 20         | mg/dL         |
| HGB                     | 2          | 25         | g/dL          | <b>Temperature</b>     | 20         | 43         | C°            |
| INR                     | 0.5        | 5          |               | Triglycerides          | 10         | 2000       | mg/dL         |
| Lactate                 | 0.2        | 15         | mmol/L        | <b>Troponin</b>        | 1          | 40000      | ng/L          |
| <b>LDH</b>              | 0          | 50000      | U/L           | Vitamin B12            | 100        | 2500       | pg/ml         |
| <b>Lymphocytes (#)</b>  | 0          | 20         | 10e3/ $\mu$ L | <b>WBC</b>             | 0.2        | 100        | 10e3/ $\mu$ L |

**Supplementary Table 5: Hyperparameters used in the models.** Hyperparameter search grid and fixed hyperparameters used for the predictive models. The hyperparameter combinations were evaluated on each fold in the cross-validation and the average performance was computed. The optimal values used for the final model (CatBoost) appear in bold type. ‘poly’: polynomial kernel function; ‘rbf’: Radial basis function.

| <b>Model</b>               | <b>Hyperparameter</b>         | <b>Grid / Fixed value</b>             |
|----------------------------|-------------------------------|---------------------------------------|
| <b>CatBoost</b>            | Maximum number of trees       | 1,000                                 |
|                            | Maximum depth                 | [6, <b>8</b> , 10]                    |
|                            | Learning rate                 | [0.001, 0.01, <b>0.03</b> , 0.1, 0.3] |
|                            | L2 Regularization coefficient | [1, 3, <b>5</b> ]                     |
| <b>XGBoost</b>             | Number of trees               | 100                                   |
|                            | Maximum depth                 | [6, 8, 10]                            |
|                            | Learning rate                 | [0.001, 0.01, 0.03, 0.1, 0.3]         |
|                            | colsample_bytree              | 1                                     |
| <b>GBT</b>                 | Number of trees               | 100                                   |
|                            | Maximum depth                 | [6, 8, 10]                            |
|                            | Learning rate                 | [0.001, 0.01, 0.03, 0.1, 0.3]         |
| <b>Random Forest</b>       | Number of trees               | 100                                   |
|                            | Maximum depth                 | [6, 8, 10]                            |
| <b>Logistic Regression</b> | Regularization                | [L1, L2]                              |
| <b>Linear Regression</b>   | Regularization                | [L1, L2]                              |
| <b>SVM</b>                 | Kernel                        | ['linear', 'poly', 'rbf', 'sigmoid']  |
| <b>NB</b>                  | N/A                           | N/A                                   |

**Supplementary Table 6: Top 100 features in importance as calculated by XGBoost.** SD: standard deviation; /: ratio between two features. 24h,72h: time windows in which the statistic was computed. If the time window is not mentioned, the statistics is calculated on the entire hospitalization period up to the prediction time.

|                                |                              |                            |
|--------------------------------|------------------------------|----------------------------|
| Age                            | Fibrinogen delta mean        | Neutrophils (#) min        |
| BMI                            | Fibrinogen delta mean 24h    | Neutrophils (#) min 72h    |
| Lactate                        | Fibrinogen max 72h           | Neutrophils (#) / Glucose  |
| Neutrophils (%)                | Fibrinogen mean              | Neutrophils (#) / Platelet |
| Sodium                         | Glucose mean                 | Neutrophils (#) trend      |
| Saturation O2 - arterial blood | Glucose min 72h              | Neutrophils (%) max        |
| Albumin mean 24h               | Glucose / Troponin           | Neutrophils (%) max 24h    |
| Albumin min 24h                | Glucose SD                   | Neutrophils (%) max 72h    |
| Albumin min 72h                | LDH max                      | Neutrophils (%) min        |
| Albumin / PTT                  | LDH max 72h                  | Neutrophils (%) min 72h    |
| Albumin SD                     | LDH mean                     | Neutrophils (%) / ALT      |
| Albumin SD 72h                 | LDH mean 72h                 | Neutrophils (%) / AST      |
| ALT / Fibrinogen               | LDH min 72h                  | Neutrophils (%) / D-dimer  |
| AST min 72h                    | LDH / Albumin                | Platelet delta             |
| AST / Platelet                 | LDH / ALT                    | Platelet SD 24h            |
| AST SD 72h                     | LDH / Platelet               | Platelet SD 72h            |
| BUN lr slope                   | LDH SD 72h                   | PTT lr slope               |
| BUN delta mean 72h             | Lymphocytes (#) min          | PTT max 24h                |
| BUN min                        | Lymphocytes (#) / D-dimer    | PTT mean 72h               |
| BUN / ALT                      | Lymphocytes (#) / Ferritin   | PTT min 24h                |
| BUN / Ferritin                 | Lymphocytes (#) / PTT        | Temperature max            |
| BUN / Troponin                 | Lymphocytes (#) SD 72h       | Temperature mean 72h       |
| BUN SD                         | Lymphocytes (%) max          | Temperature min            |
| D-dimer max                    | Lymphocytes (%) max 24h      | Temperature min 24h        |
| D-dimer max 72h                | Lymphocytes (%) mean 72h     | Temperature min 72h        |
| D-dimer min                    | Lymphocytes (%) / AST        | Temperature SD             |
| D-dimer min 72h                | Lymphocytes (%) / D-dimer    | Temperature SD 72h         |
| D-dimer / Albumin              | Lymphocytes (%) / Fibrinogen | Troponin delta mean        |
| D-dimer / AST                  | Lymphocytes (%) / PTT        | Troponin SD 72h            |
| D-dimer / Ferritin             | Lymphocytes (%) SD           | WBC min 24h                |
| D-dimer / Fibrinogen           | Lymphocytes (%) SD 24h       | WBC / D-dimer              |
| D-dimer / Platelet             | Neutrophils (#) max          | WBC SD                     |
| D-dimer SD                     | Neutrophils (#) max 72h      |                            |
| Ferritin / Troponin            | Neutrophils (#) mean         |                            |
